# Supplementary material for: Influence of Streptococcus pneumoniae Within-Strain Population Diversity on Virulence and Pathogenesis
Source: PubMed Central journal article supplement (PMC9927508; doi:10.1128/spectrum.03103-22), 2022-12-12
Supplement: spectrum.03103-22-s0001.pdf [file spectrum.03103-22-s0001.pdf]

1 **Supplementary Information**

2 **Supplementary Figure 1. Hydrogen peroxide production by six D39 strains. Data**

3 are presented as relative (percentage) H<sub>2</sub>O<sub>2</sub> production for each strain versus

4 NCTC7466, after normalisation for cell density, as determined by Amplex Red Hydrogen

5 Peroxide detection kit. Data are from two independent experiments. Statistical analysis

6 was by ordinary one-way ANOVA with Dunnett's multiple comparison test vs NCTC7466.

7 Only statistically significant differences are shown.

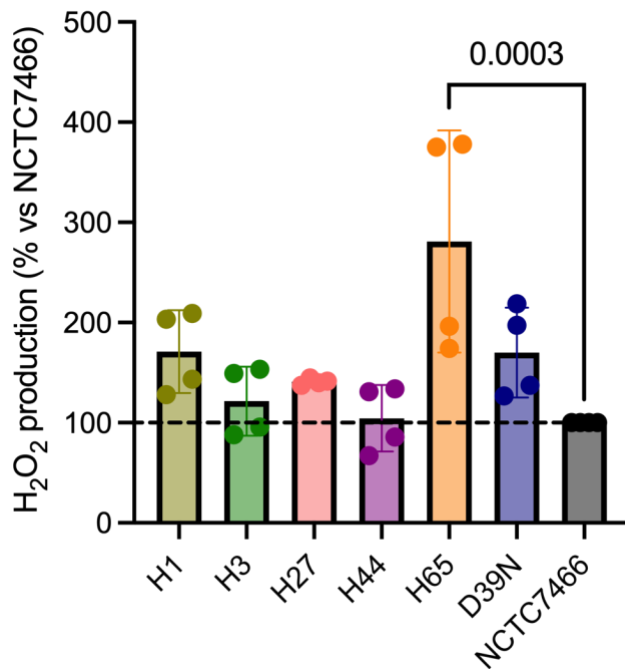

8

9

1 **Supplementary Table 1. Minimum inhibitory concentrations of beta lactam**  
2 **antibiotics against six D39 strains.** Data are presented as median MIC50 ( $\mu\text{g/ml}$ ) with  
3 the range of observed MIC50 values from three independent experiments, each  
4 containing three technical replicates per strain.

5

| Strain   | Cefotaxime             | Penicillin             | Ampicillin     |
|----------|------------------------|------------------------|----------------|
| H1       | 0.0039 (0.0039-0.0078) | 0.0039 (0.0039-0.0078) | 0.1 (0.06-0.1) |
| H3       | 0.0078                 | 0.0078 (0.0039-0.0078) | 0.1            |
| H27      | 0.0078 (0.0078-0.0156) | 0.0078 (0.0078-0.0156) | 0.1            |
| H44      | 0.0078                 | 0.0078 (0.0039-0.0078) | 0.1            |
| H65      | 0.0078 (0.0078-0.0156) | 0.0078 (0.0078-0.0156) | 0.1            |
| D39N     | 0.0078                 | 0.0078 (0.0039-0.0078) | 0.1            |
| NCTC7466 | 0.0078 (0.0078-0.0156) | 0.0078 (0.0039-0.0078) | 0.1            |

6

7

1 **Supplementary Table 2. Transformation efficiency of six D39 strains.** Data are  
2 presented as mean transformation efficiency from three independent experiments, each  
3 containing two technical replicates per strains. P values are from one-way ANOVA with  
4 Dunnett's multiple comparisons test, with NCTC7466 as the control strain.

| Strain   | Transformation efficiency | Standard deviation | P-value vs NCTC7466 |
|----------|---------------------------|--------------------|---------------------|
| H1       | $2.37 \times 10^{-3}$     | 0.0002484          | 0.1252              |
| H3       | $5.76 \times 10^{-3}$     | 0.0005558          | 0.2622              |
| H27      | $2.16 \times 10^{-3}$     | 0.0006583          | 0.2937              |
| H44      | $2.72 \times 10^{-3}$     | 0.0000584          | *0.0426             |
| H65      | $4.42 \times 10^{-4}$     | 0.0003575          | 0.0842              |
| D39N     | $2.84 \times 10^{-3}$     | 0.0004903          | 0.3523              |
| NCTC7466 | $4.00 \times 10^{-3}$     | 0.0000096          |                     |

5
